# Supplementary material for: Oregano essential oil vapour prevents Plasmopara viticola infection in grapevine (Vitis Vinifera) and primes plant immunity mechanisms
Source: PubMed Central journal article supplement (PMC6764689; doi:10.1371/journal.pone.0222854), 2019-09-27

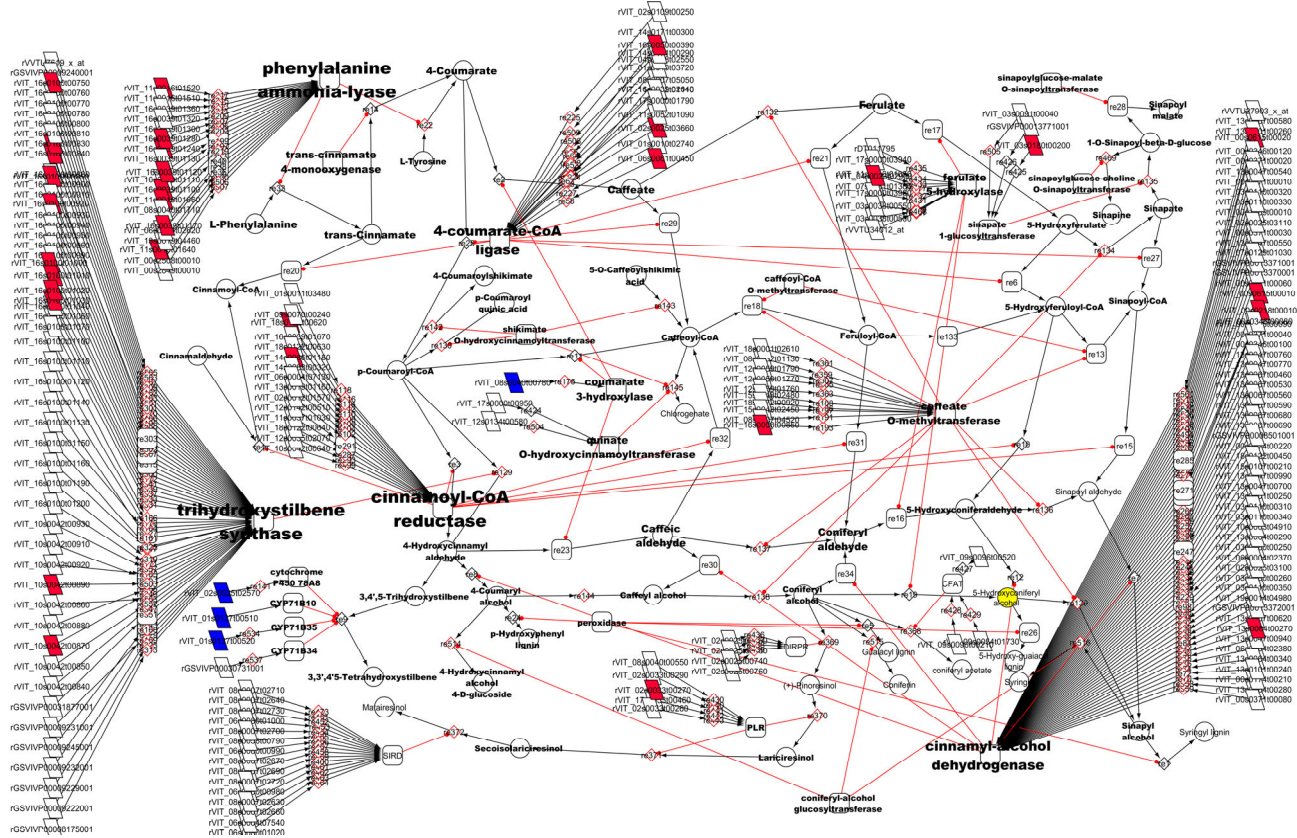

Supplement: pone.0222854.s002.pdf [file pone.0222854.s002.pdf]
